# THE AMERICAN JOURNAL OF PSYCHIATRY

November 2014

Vol. 171, No. 11:1139-1232

THE AMERICAN JOURNAL OF PSYCHIATRY

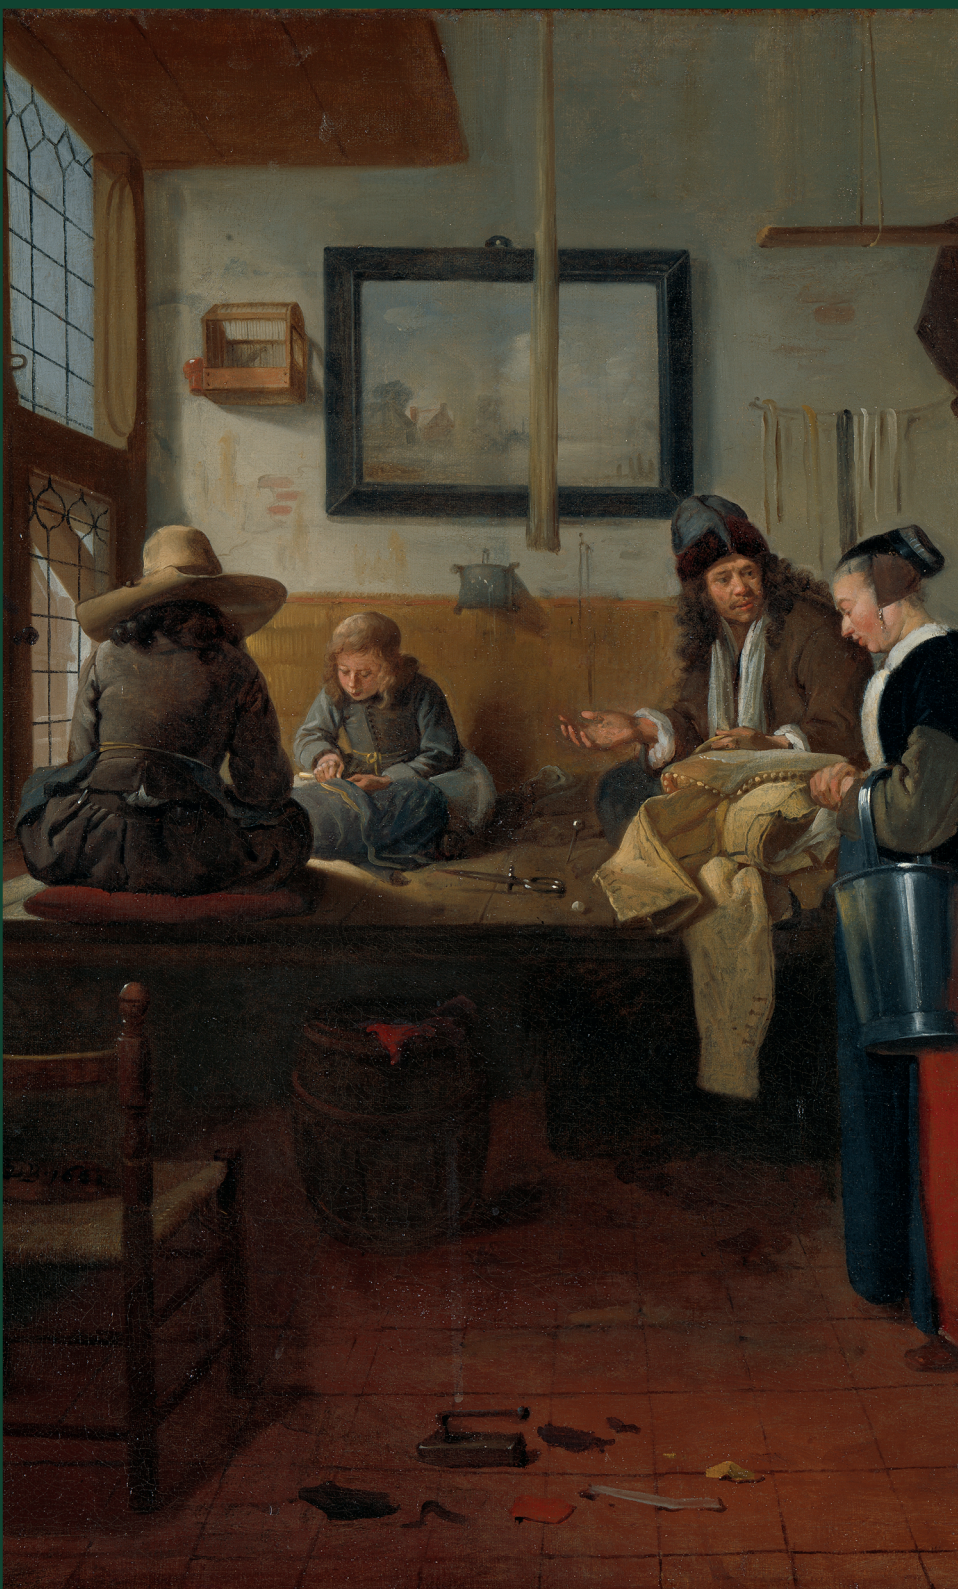

**A Translational Neuroscience Approach to Understanding the Development of Social Anxiety Disorder and Its Pathophysiology**

Andrew S. Fox, Ph.D., and  
Ned H. Kalin, M.D. 1162

**Comparison of Low and Moderate Dosages of Extended-Release Quetiapine in Borderline Personality Disorder**

Donald W. Black, M.D., et al. 1174

◀ **Long-Term Effectiveness of Supported Employment: 5-Year Follow-Up of a Randomized Controlled Trial**

Holger Hoffmann, M.D., et al. 1183

**Enhanced Neurocognitive Functioning and Positive Temperament in Twins Discordant for Bipolar Disorder**

Rachel G. Higier, Ph.D., et al. 1191

**November 2014**

**Volume 171 • Number 11**

Official Journal of the  
AMERICAN PSYCHIATRIC ASSOCIATION

[ajp.psychiatryonline.org](http://ajp.psychiatryonline.org)
