# THE AMERICAN PSYCHIATRIC ASSOCIATION

1000 Wilson Blvd., Suite 1825, Arlington, VA 22209-3901  
(888) 357-7924 (toll-free inside the U.S. and Canada) / (703) 907-7300  
web site: [www.psychiatry.org](http://www.psychiatry.org) • e-mail: [apa@psych.org](mailto:apa@psych.org)

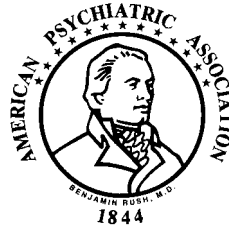

## OFFICERS 2014–2015

|                 |                        |
|-----------------|------------------------|
| President       | Paul Summergrad, M.D.  |
| President-Elect | Renée L. Binder, M.D.  |
| Treasurer       | Frank W. Brown, M.D.   |
| Secretary       | Maria A. Oquendo, M.D. |

## ASSEMBLY

|               |                                   |
|---------------|-----------------------------------|
| Speaker       | Jenny L. Boyer, M.D., Ph.D., J.D. |
| Speaker-Elect | Glenn A. Martin, M.D.             |
| Recorder      | Daniel J. Anzia, M.D.             |

## OFFICE OF THE CEO AND MEDICAL DIRECTOR

CEO and Medical Director    Saul Levin, M.D., M.P.A.

## BOARD OF TRUSTEES

|                         |                                 |                        |
|-------------------------|---------------------------------|------------------------|
| Jeffrey Akaka, M.D.     | Jeffrey L. Geller, M.D., M.P.H. | John M. Oldham, M.D.   |
| R. Scott Benson, M.D.   | Dilip V. Jeste, M.D.            | Vivian B. Pender, M.D. |
| Lara J. Cox, M.D., M.S. | Judith F. Kashtan, M.D.         | Gail E. Robinson, M.D. |
| Brian Crowley, M.D.     | Jeffrey A. Lieberman, M.D.      | Ravi N. Shah, M.D.     |
| Anita S. Everett, M.D.  | Molly K. McVoy, M.D.            | Melinda Young, M.D.    |

## PUBLISHER

Rebecca D. Rinehart

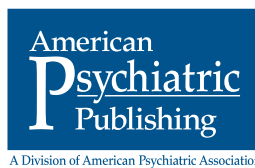

The American Journal of Psychiatry is online at [ajp.psychiatryonline.org](http://ajp.psychiatryonline.org)

THE AMERICAN PSYCHIATRIC ASSOCIATION  
Chairpersons of Councils, Commissions, Committees, and Task Forces

Standing Committees

**Bylaws**

Rebecca W. Brendel, M.D., J.D.

**Elections**

Barry K. Herman, M.D.

**Ethics**

Richard D. Milone, M.D.

**Finance and Budget**

Alan F. Schatzberg, M.D.

*Audit*

Frank W. Brown, M.D.

*Investment Oversight*

David Fassler, M.D.

**Joint Reference**

Renée L. Binder, M.D.

**Membership**

Rahn K. Bailey, M.D.

**Nominating**

Jeffrey A. Lieberman, M.D.

**Tellers**

Hind Benjelloun, M.D.

**Council on Addiction Psychiatry**

Frances R. Levin, M.D.

**Council on Advocacy and Government Relations**

Barry B. Perlman, M.D.

*Advocacy and Litigation Funding*

Jack Drescher, M.D.

*Caucus of State Hospital Psychiatrists*

*Caucus of VA Psychiatrists*

**Council on Children, Adolescents, and Their Families**

Louis J. Kraus, M.D.

*Agnes Purcell McGavin Award*

Christopher J. McDougale, M.D.

*Blanche F. Ittleson Research Award*

*Caucus of Psychiatrists Treating Persons With Intellectual Disabilities*

*College Mental Health Caucus*

**Council on Communications**

Raymond J. DePaulo, M.D.

**Council on Geriatric Psychiatry**

Robert P. Roca, M.D.

**Council on Healthcare Systems and Financing**

Harsh K. Trivedi, M.D.

*Reimbursement for Psychiatric Care*

Bruce J. Schwartz, M.D.

*RBRVS, Codes and Reimbursement*

Ronald M. Burd, M.D.

**Council on International Psychiatry**

Dilip V. Jeste, M.D.

*Caucus on Global Mental Health and Psychiatry*

**Council on Medical Education and Lifelong Learning**

Richard F. Summers, M.D.

*APA Public Psychiatry Fellowship Selection Committee*

Christina V. Mangurian, M.D.

*APA/SAMHSA Minority Fellowship Selection and Advisory*

Altha J. Stewart, M.D.

*Caucus on MOC Issues*

*Caucus of Resident-Fellow Members*

*Scientific Program*

Philip R. Muskin, M.D.

*Scientific Program Committee of the Institute on Psychiatric Services*

Hunter L. McQuiston, M.D.

*Subcommittee on Joint Sponsorship of Continuing Medical Education (CME)*

*Vestermark Award Committee*

Jonathan F. Borus, M.D.

**Council on Minority Mental Health and Health Disparities**

Sandra C. Walker, M.D.

*Caucus of Rural Psychiatrists*

*Caucus on Religion, Spirituality and Psychiatry*

**Council on Psychiatry And Law**

Steven K. Hoge, M.D.

*Caucus of Correctional Psychiatrists*

*Isaac Ray/Human Rights Award*

Mardoche Sidor, M.D.

*Judicial Action*

Paul S. Appelbaum, M.D.

*Manfred S. Guttmacher Award*

David A. Lowenthal, M.D.

**Council on Psychosomatic Medicine (Consultation Liaison Psychiatry)**

David F. Gitlin, M.D.

**Council on Quality Care**

Joel Yager, M.D.

*Mental Health Information Technology*

Steven Roy Daviss, M.D.

*Steering Committee on Practice Guidelines*

Michael J. Vergare, M.D.

**Council on Research**

Dwight L. Evans, M.D.

*Caucus of Psychiatrists Treating Persons with Eating Disorders*

*Caucus on Alternative and Complementary Medicine*

*Psychiatric Dimensions of Disasters*

Charles R. Marmar, M.D.

*Research Awards*

B. Timothy Walsh, M.D.

*Task Force to Revise the Practice of Electroconvulsive Therapy*

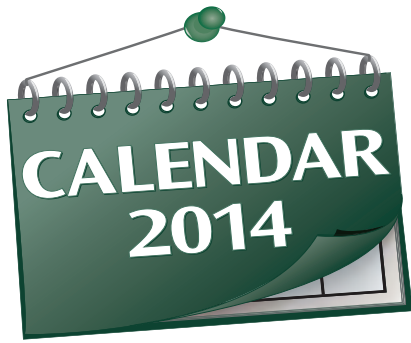

For free listing of your organization's official annual or regional meeting, please send us the following information: sponsor, location, inclusive dates, type and number of continuing education credits (if available), and the name, address, and telephone number of the person or group to contact for more information. In order for an event to appear in our listing, all notices and changes must be received at least 6 months in advance of the meeting and should be addressed to:

**Calendar, American Journal of Psychiatry, 1000 Wilson Boulevard, Suite 1825, Arlington, VA 22209-3901, [swestate@psych.org](mailto:swestate@psych.org) (e-mail).**

Because of space limitations, only listings of meetings of the greatest interest to Journal readers may be included.

## FEBRUARY 2015

**February 11–15**, 20th Annual Psychopharmacology Update from Paris Hotel, Las Vegas, Nevada. Sponsored by The Nevada Psychiatric Association. Contact: (877) 493-0007 (phone); [www.nvpsychiatry.org](http://www.nvpsychiatry.org) (web site).

**February 16–19**, Update on Psychiatry: Continuing a Proud 23 Year Tradition. JW Marriott Starr Pass Resort, Tucson, Arizona. Sponsored by: Univ. of Arizona College of Medicine, Department of Psychiatry; Arizona Psychiatric Society; Arizo-

na Psychological Association. Contact: [uapsycon@email.arizona.edu](mailto:uapsycon@email.arizona.edu) (e-mail); (520) 626-1392 (phone); [www.psychopharm.arizona.edu](http://www.psychopharm.arizona.edu) (web site).

## An essential digital companion to the DSM-5®

*NEW! – Now Spanish language supported!*

### DSM-5® Diagnostic Criteria Mobile App

American Psychiatric Association

The **DSM-5® Diagnostic Criteria Mobile App** is designed to help mental health practitioners, researchers and students fully integrate the new DSM criteria and codes into their practice and study. Users have full offline access to all of the criteria sets as well as online access to supporting videos, commentary and resources. Powerful search and customization tools aid and enhance assessment of symptom presentations in a variety of clinical and administrative settings. It features:

- Access to the complete DSM-5® diagnostic criteria sets on your phone and tablet
- Up to date access to ICD-9-CM and ICD-10-CM codes for clinical and administrative use
- Video commentary from the DSM-5 task force members highlighting changes from DSM-IV to DSM-5
- Robust disorder, acronym, code and symptom search functionality
- Bookmarking allows customization of the criteria sets most commonly referenced

Available for both iOS and Android compatible devices through the iTunes store and Google Play.

As the DSM-5® Diagnostic Criteria Mobile App is only available for sale through the iTunes and Android stores, it is not possible for us to extend our traditional APA Member or APA Resident-Fellow Member discounts on the purchase of this product.

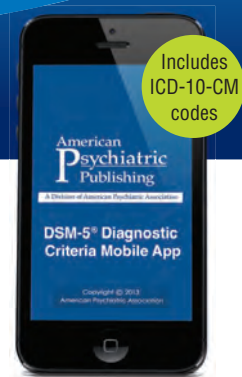

# There's So Much More to AJP Than Meets the Page!

Visit *The American Journal of Psychiatry's* website on PsychiatryOnline for the following features!

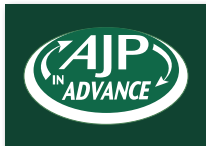

## AJP in Advance

The very latest research advances!

At **AJP in Advance**, you can discover the following before their appearance in print:

### **Inflammatory Biomarker Predicts Differential Outcome of Depression Treatment**

Considerable research links inflammation to the diagnosis of major depressive disorder. However, it has remained unclear how this relationship might impact the care of specific patients with depression. Uher and colleagues show that patients with relatively high levels of C-reactive protein, an inflammatory marker, are particularly likely to respond to nortriptyline, whereas patients with low levels of the marker are particularly likely to respond to citalopram. Thus, information on inflammation may help clinicians tailor treatment.

### **Combined Epigenetic and Genetic Biomarker Predicting Suicidal Behaviors**

Considerable research suggests that suicide involves effects of genes, the environment, and their interaction. However, it remains unclear how such factors interact to shape brain function. The authors apply genome-wide methylation techniques to post-mortem data among individuals with a history of suicide, major depression, or neither factor. Across three independent data sets of post-mortem brains, they found signs of increased methylation in one particular gene, SKA2, and they extended this finding to peripheral blood samples from other cohorts of prospectively followed individuals. The consistency and strength of the findings call attention to a novel gene and the way that this gene influenced the response to stress.

## AJP CME

Three articles in this issue form the basis of a short course with questions that can be answered for up to 1 *AMA PRA Category 1 Credit™* each by visiting <http://psychiatryonline.org/cme.aspx> and clicking on the "**American Journal of Psychiatry**" tab. CME credit is issued only **online**, and a paid subscription to AJP CME course program is required. This month's courses appear on pages \_\_\_-\_\_\_.

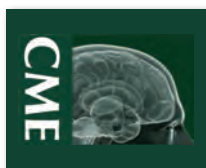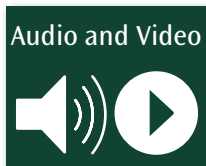

## Have You Heard?

With AJP Audio you can listen to highlights of this issue. This month, Deputy Editor Susan K. Schultz, M.D., discusses pulmonary embolism in psychiatric patients, the combination of varenicline and bupropion for smokers who don't respond to a nicotine patch, quetiapine for treatment of borderline personality disorder, positive traits in co-twins of patients with bipolar disorder, genetic and environmental contributions to familial recurrence of autism spectrum disorder, and long-term outcomes of supported employment for persons with severe mental illness. Also, visit the online edition of this month's Journal and click "In This Issue" to view a video of Deputy Editor Daniel S. Pine, M.D., presenting highlights from the issue.

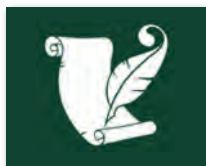

## Revisit the Journal's rich history!

### **75 years ago this month: Kurt Goldstein on Balancing Psychological and Somatic Testing and Treatment**

In an article titled "The Significance of Special Mental Tests for Diagnosis and Prognosis in Schizophrenia," Dr. Goldstein reminds readers, during an era of rapid development in somatic treatments, of the importance of psychological investigations in patients with schizophrenia. "The treatment of schizophrenics with insulin and other similar somatic methods is apt to push into the background all interest in the psychological investigation of schizophrenia. There are several reasons, however, which should induce us not to neglect the psychological investigation."

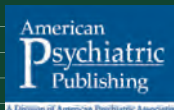

[ajp.psychiatryonline.org](http://ajp.psychiatryonline.org)

[www.appi.org](http://www.appi.org) • 1-800-368-5777 • Fax: 703-907-1091 • Email: [appi@psych.org](mailto:appi@psych.org)

Psychiatry Online 4/11/09

# The Residents' JOURNAL

## THE AMERICAN JOURNAL OF PSYCHIATRY RESIDENTS' JOURNAL

October 2014

Volume 9

Issue 10

### Inside

- 2 **Mapping the Human Connectome**  
Rajiv Radhakrishnan, M.B.B.S., M.D.  
Senior Deputy Editor
- 3 **Attending to Safety in the Psychiatric Interview**  
Tobias D. Wasser, M.D.
- 6 **Family History of an Alcohol Use Disorder and Ketamine's Antidepressant Efficacy in Major Depression**  
Mark J. Niciu, M.D., Ph.D.
- 9 **A Unique Differential Diagnosis in a Case of Abnormal Motor Movements**  
Adriana de Julio, M.D., M.S.P.H.  
Sarah Hutton, M.D.
- 12 **How to Talk to Parents About Autism**  
Panchajanya Paul, M.B.B.S., M.D.
- 13 **Are We Hastily Embracing Biomarkers?**  
Pravesh Sharma, M.D.
- 13 **Response to Sharma**  
Nilesh S. Tannu, M.D., M.S.
- 14 **Residents' Resources**
- 15 **Author Information and Upcoming Themes**

### In This Issue

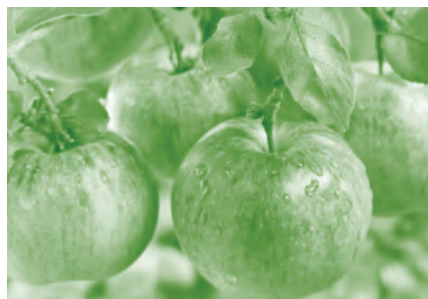

In this issue, Rajiv Radhakrishnan, M.B.B.S., M.D., presents a brief history of the human connectome, with mention of current connectome projects. Tobias D. Wasser, M.D., provides a pragmatic guide for conducting the psychiatric interview, including attending to safety, establishing boundaries, and recognizing signs of escalation. Mark J. Niciu, M.D., Ph.D., examines the efficacy of ketamine in the treatment of major depressive disorder and bipolar depression and the link between a positive family history of an alcohol use disorder and ketamine's efficacy. In a case report, Adriana de Julio, M.D., M.S.P.H., and Sarah Hutton, M.D., discuss psychogenic nonepileptic seizures in a patient with alcohol withdrawal. Panchajanya Paul, M.B.B.S., M.D., presents a review of the book *How to Talk to Patients About Autism*. Lastly, in a letter to the Editor, Pravesh Sharma, M.D., offers cautionary guidance in using biomarkers to diagnose psychiatric illnesses, with a response from Nilesh S. Tannu, M.D., M.S., who emphasizes the need for objective guidelines in the use of biomarkers.

Editor-in-Chief  
Misty Richards, M.D., M.S.

Senior Deputy Editor  
Rajiv Radhakrishnan, M.B.B.S., M.D.

Deputy Editor  
Tobias Wasser, M.D.

Associate Editors  
Ijeoma Chukwu, M.D., M.P.H.  
Kathleen Mary Patchan, M.D.

Media Editor  
Holly S. Peek, M.D., M.P.H.

Staff Editor  
Angela Moore

Editors Emeriti  
Sarah B. Johnson, M.D.  
Molly McVoy, M.D.  
Joseph M. Cerimele, M.D.  
Sarah M. Fayad, M.D.  
Monifa Seawell, M.D.  
Arshya Vahabzadeh, M.D.

### Editor-in-Chief

Misty Richards, M.D., M.S.

### Senior Deputy Editor

Rajiv Radhakrishnan, M.B.B.S., M.D.

### Deputy Editor

Tobias Wasser, M.D.

### Associate Editors

Ijeoma Chukwu, M.D., M.P.H.

Kathleen Mary Patchan, M.D.

### Media Editor

Holly S. Peek, M.D., M.P.H.

*The Residents' Journal* accepts manuscripts authored by medical students, resident physicians, and fellows. To submit your paper, please visit the manuscript submission site at [mc.manuscriptcentral.com/appi-ajp](http://mc.manuscriptcentral.com/appi-ajp) and either create an account or use your existing account. For manuscript type, select "Residents." Then follow the instructions to upload your manuscript. Residents who are interested in participating as Guest Section Editors should e-mail *The Residents' Journal* Editor-in-Chief Misty Richards at [misty.richards@gmail.com](mailto:misty.richards@gmail.com).

*The Residents' Journal* is sent free-of-charge to all psychiatry residents. Anyone interested in being included on the distribution list should contact Angela Moore, *The Residents' Journal* staff editor at [ajp@psych.org](mailto:ajp@psych.org) with "Subscribe to Residents' Journal" in the subject line.

To access the complete Residents' Journal archives, visit [ajp.psychiatryonline.org/residents\\_journal.aspx](http://ajp.psychiatryonline.org/residents_journal.aspx)

## Contents

- A13 Editorial Board  
A15 Highlights of this issue

## Editorial

- 257 **Does the stigma of mental illness contribute to suicidality?**  
N. Rüsch, A. Zlati, G. Black and G. Thornicroft

- 259 **Intense romantic love in a 12-century Persian medical encyclopaedia – extra**  
Behnam Dalfardi, Golnoush Sadat Mahmoudi Nezhad and Ahmad Ghanizadeh

## Review articles

- 260 **Excess of non-right-handedness in schizophrenia: meta-analysis of gender effects and potential biases in handedness assessment**  
M. Hirnstein and K. Hugdahl
- 268 **Psychotherapy for subclinical depression: meta-analysis**  
P. Cuijpers, S. L. Koole, A. van Dijke, M. Roca, J. Li and C. F. Reynolds III

- 274 **The Man He Killed – poem**  
Thomas Hardy

## Papers

- 275 **Psychiatric resilience: longitudinal twin study**  
A. B. Amstadter, J. M. Myers and K. S. Kendler
- 281 **Invited commentary on . . . Psychiatric resilience: longitudinal twin study**  
J. Wertz and C. M. Pariante
- 283 **Suicide rates in children aged 10–14 years worldwide: changes in the past two decades**  
K. Kölves and D. De Leo
- 286 **Childhood family income, adolescent violent criminality and substance misuse: quasi-experimental total population study**  
A. Sariaslan, H. Larsson, B. D'Onofrio, N. Långström and P. Lichtenstein
- 291 **Clinical and social factors associated with attention-deficit hyperactivity disorder medication use: population-based longitudinal study**  
C. Galéra, J.-B. Pingault, G. Michel, M.-P. Bouvard, M. Melchior, B. Falissard, M. Boivin, R. E. Tremblay and S. M. Côté

- 297 **Postpartum psychosis – in 100 words**  
Roch Cantwell

- 298 **Pathways of care of women in secure hospitals: which women go where and why**  
A. Bartlett, N. Somers, M. Fiander and M. A. Harty

- 307 **Internet-delivered exposure-based cognitive-behavioural therapy and behavioural stress management for severe health anxiety: randomised controlled trial**  
E. Hedman, E. Axelsson, A. Göring, C. Ritzman, M. Ronnheden, S. El Alaoui, E. Andersson, M. Lekander and B. Ljótsson

- 315 **White matter integrity and late-life depression in community-dwelling individuals: diffusion tensor imaging study using tract-based spatial statistics**  
S. Reppermund, L. Zhuang, W. Wen, M. J. Slavin, J. N. Trollor, H. Brodaty and P. S. Sachdev

- 321 **Diffusion tensor imaging predictors of treatment outcomes in major depressive disorder**  
M. S. Korgaonkar, L. M. Williams, Y. J. Song, T. Usherwood and S. M. Grieve

- 328 **A dissection of 'Paranoid Android' – psychiatry in music**  
Parashar Ramanuj

## Columns

- 329 Correspondence  
330 Correction  
331 Book reviews  
332 Contents of *Advances in Psychiatric Treatment*  
333 Contents of the *American Journal of Psychiatry*  
334 Kaleidoscope  
336 From the Editor's desk

## Cover picture

*The Demonstration* (late 1950s/early 60s, poster paint on paper). Mary Bishop (b: currently unknown; d: 1990).

Mary Bishop's father had died in the First World War. She became psychotic while serving in the Women's Auxiliary Air Force during the Second World War. She was admitted to Netherne Hospital around 1946 and discharged circa 1983. During these years, she painted thousands of pictures in Edward Adamson's Netherne art studios depicting her isolation, depression, anger, and despair. About 300 works survive and are part of the recently found Adamson Collection. Adamson was a British artist who pioneered the use of art as therapy. In his book *Art as Healing* (1984; re-printed 2014, Adamson Collection Trust) he comments on *The Demonstration*: 'Here she illustrates exactly how it feels to be demonstrated in front of a group of medical students. She feels that she is entirely naked before an audience of blockheads' (p.21). Adamson adds: 'She told me that her existence was only made bearable by the fact that she could come and paint whenever she liked'.

David O'Flynn, Consultant Psychiatrist, SLAM, and Chair, Adamson Collection Trust.

Courtesy of the Adamson Collection Trust.

We are always looking for interesting and visually appealing images for the cover of the *Journal* and would welcome suggestions or pictures, which should be sent to Dr Allan Beveridge, British Journal of Psychiatry, 21 Prescot Street, London E1 8BB, UK or [bjp@rcpsych.ac.uk](mailto:bjp@rcpsych.ac.uk).

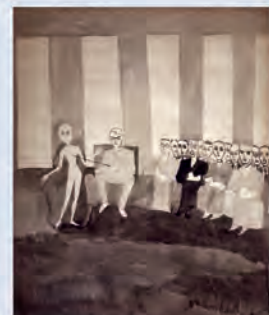

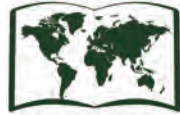

# SHARP

Shanghai Archives of Psychiatry · Since 1959

上 海 精 神 医 学

WWW.SAPONLINE.ORG/EN

AUGUST 2014 • VOL. 26 • NO. 4

## IN THIS ISSUE

doi: <http://dx.doi.org/10.3969/j.issn.1002-0829.2014.04.001>

## REVIEW

### Advances in neuroimaging research of schizophrenia in China

Dengtang LIU, Yifeng XU, Kaida JIANG

doi: <http://dx.doi.org/10.3969/j.issn.1002-0829.2014.04.002>

### Advances in molecular genetic studies of attention deficit hyperactivity disorder in China

Qian GAO, Lu LIU, Qiujin QIAN, Yufeng WANG

doi: <http://dx.doi.org/10.3969/j.issn.1002-0829.2014.04.003>

## ORIGINAL ARTICLES

### Case-control resting-state fMRI study of brain functioning among adolescents with first-episode major depressive disorder

Yun GONG, Lili HAO, Xiyang ZHANG, Yan ZHOU, Jianqi LI, Zhimin ZHAO, Wenqing JIANG, Yasong DU

doi: <http://dx.doi.org/10.3969/j.issn.1002-0829.2014.04.004>

### Cross-sectional study of use of electronic media by secondary school students in Bangkok, Thailand

Komsan KIATRUNGKIT,  
Sirichai HONGSANGUANSRI

doi: <http://dx.doi.org/10.3969/j.issn.1002-0829.2014.04.005>

## FORUM

### Comorbidity of depressive and anxiety disorders: challenges in diagnosis and assessment

Zhiguo WU, Yiru FANG

doi: <http://dx.doi.org/10.3969/j.issn.1002-0829.2014.04.006>

## CASE REPORT

### Case report of narcolepsy in a six-year-old child initially misdiagnosed as atypical epilepsy

Jinquan ZHOU, Xi ZHANG, Zaiwen DONG

doi: <http://dx.doi.org/10.3969/j.issn.1002-0829.2014.04.007>

## BIostatistics in Psychiatry (22)

### Structural zeroes and zero-inflated models

Hua HE, Wan TANG, Wenjuan WANG,  
Paul CRITS-CHRISTOPH

doi: <http://dx.doi.org/10.3969/j.issn.1002-0829.2014.04.008>

## CORRESPONDENCE

### Lithium-related neurotoxicity despite serum concentrations in the therapeutic range: risk factors and diagnosis

Bruno MÉGARBANE, Anne-Sophie HANAK,  
Lucie CHEVILLARD

doi: <http://dx.doi.org/10.3969/j.issn.1002-0829.2014.04.009>
